# Supplementary material for: cyCombine allows for robust integration of single-cell cytometry datasets within and across technologies
Source: PubMed Central journal article supplement (PMC8971492; doi:10.1038/s41467-022-29383-5), 2022-03-31
Supplement: 41467_2022_29383_MOESM4_ESM.pdf [file 41467_2022_29383_MOESM4_ESM.pdf]

### **Description of Additional Supplementary Files**

File Name: Supplementary Data 1

Description: CyTOF panels for the CLL and HD dataset.
